# Supplementary material
Source: publisher figshare collection journal article supplement (https://acs.figshare.com/ndownloader/files/5109925)
Supplement: Supplementary file 1 [file 5109925]

data_1 
 
_audit_creation_method            SHELXL-97 
_chemical_name_systematic 
; 
 ? 
; 
_chemical_name_common             ? 
_chemical_melting_point           ? 
_chemical_compound_source          'local laboratory'
_chemical_formula_moiety     'C19 H14 Cl2 O4, C2 H6 O, H2 O' 
_chemical_formula_sum        'C21 H22 Cl2 O6' 
_chemical_formula_weight          441.3 
 
loop_ 
 _atom_type_symbol 
 _atom_type_description 
 _atom_type_scat_dispersion_real 
 _atom_type_scat_dispersion_imag 
 _atom_type_scat_source 
 'C'  'C'   0.0033   0.0016 
 'International Tables Vol C Tables 4.2.6.8 and 6.1.1.4' 
 'H'  'H'   0.0000   0.0000 
 'International Tables Vol C Tables 4.2.6.8 and 6.1.1.4' 
 'Cl'  'Cl'   0.1484   0.1585 
 'International Tables Vol C Tables 4.2.6.8 and 6.1.1.4' 
 'O'  'O'   0.0106   0.0060 
 'International Tables Vol C Tables 4.2.6.8 and 6.1.1.4' 
 
_symmetry_space_group_name_H-M 'P -1          '
_symmetry_space_group_name_Hall     '-P 1'
_symmetry_cell_setting 'Triclinic'
 
loop_ 
 _symmetry_equiv_pos_as_xyz 
 'x, y, z' 
 '-x, -y, -z' 
 
_cell_length_a                    9.499(2) 
_cell_length_b                    10.891(2) 
_cell_length_c                    11.067(2) 
_cell_angle_alpha                 109.873(6) 
_cell_angle_beta                  112.697(7) 
_cell_angle_gamma                 100.841(12) 
_cell_volume                      923.7(3) 
_cell_formula_units_Z             2 
_cell_measurement_temperature     100
_cell_measurement_reflns_used     1610
_cell_measurement_theta_min        2.5
_cell_measurement_theta_max        22.5
 
_exptl_crystal_description        blade
_exptl_crystal_colour             yellow
_exptl_crystal_size_max           0.30 
_exptl_crystal_size_mid           0.07 
_exptl_crystal_size_min           0.05 
_exptl_crystal_density_meas       ? 
_exptl_crystal_density_diffrn     1.59 
_exptl_crystal_density_method     'not measured' 
_exptl_crystal_F_000              444 
_exptl_absorpt_coefficient_mu     0.388 
_exptl_absorpt_correction_type 'multi-scan' 
_exptl_absorpt_correction_T_min   0.892 
_exptl_absorpt_correction_T_max   0.981 
_exptl_absorpt_process_details  'HKL Scalepack (Otwinowski & Minor 1997)' 
 
_exptl_special_details 
; 
 ? 
; 
 
_diffrn_ambient_temperature       100
_diffrn_radiation_wavelength      0.71073 
_diffrn_radiation_type            MoK\a 
_diffrn_radiation_source          'fine-focus sealed tube' 
_diffrn_radiation_monochromator   graphite 
_diffrn_measurement_device  'KappaCCD (with Oxford Cryostream)'
_diffrn_measurement_method       ' \w scans with \k offsets'
_diffrn_detector_area_resol_mean  ? 
_diffrn_standards_number          0 
_diffrn_standards_interval_count  ? 
_diffrn_standards_interval_time   ? 
_diffrn_standards_decay_%         <2 
_diffrn_reflns_number             3775 
_diffrn_reflns_av_R_equivalents   0.070 
_diffrn_reflns_av_sigmaI/netI     0.111 
_diffrn_reflns_limit_h_min        -10 
_diffrn_reflns_limit_h_max        10 
_diffrn_reflns_limit_k_min        -11 
_diffrn_reflns_limit_k_max        11 
_diffrn_reflns_limit_l_min        -11 
_diffrn_reflns_limit_l_max        11 
_diffrn_reflns_theta_min          3.1
_diffrn_reflns_theta_max          22.3 
_reflns_number_total              2164 
_reflns_number_gt                 1336 
_reflns_threshold_expression      I>2\s(I) 
 
_computing_data_collection        'COLLECT (Nonius, 2000)'
_computing_cell_refinement        'HKL Scalepack (Otwinowski & Minor 1997)'
_computing_data_reduction   'HKL Denzo and Scalepack (Otwinowski & Minor 1997)'
_computing_structure_solution     'SIR97 (Altomare  et al., 1999)'
_computing_structure_refinement   'SHELXL-97 (Sheldrick, 1997)' 
_computing_molecular_graphics     'ORTEP-3 for Windows (Farrugia, 1997)'
_computing_publication_material   'SHELXL-97 (Sheldrick, 1997)'
 
_refine_special_details 
; 
 Refinement of F^2^ against ALL reflections.  The weighted R-factor wR and 
 goodness of fit S are based on F^2^, conventional R-factors R are based 
 on F, with F set to zero for negative F^2^. The threshold expression of 
 F^2^ > 2sigma(F^2^) is used only for calculating R-factors(gt) etc. and is 
 not relevant to the choice of reflections for refinement.  R-factors based 
 on F^2^ are statistically about twice as large as those based on F, and R- 
 factors based on ALL data will be even larger. 
; 
 
_refine_ls_structure_factor_coef  Fsqd  
_refine_ls_matrix_type            full 
_refine_ls_weighting_scheme       calc  
_refine_ls_weighting_details 
 'calc w=1/[\s^2^(Fo^2^)+(0.0979P)^2^+1.1049P] where P=(Fo^2^+2Fc^2^)/3' 
_atom_sites_solution_primary      direct 
_atom_sites_solution_secondary    difmap 
_atom_sites_solution_hydrogens    geom 
_refine_ls_hydrogen_treatment     constr
_refine_ls_extinction_method      none 
_refine_ls_extinction_coef        ? 
_refine_ls_number_reflns          2164 
_refine_ls_number_parameters      257 
_refine_ls_number_restraints      0 
_refine_ls_R_factor_all           0.127 
_refine_ls_R_factor_gt            0.074 
_refine_ls_wR_factor_ref          0.213 
_refine_ls_wR_factor_gt           0.182 
_refine_ls_goodness_of_fit_ref    1.045 
_refine_ls_restrained_S_all       1.045 
_refine_ls_shift/su_max           0.000 
_refine_ls_shift/su_mean          0.000 
 
loop_ 
 _atom_site_label 
 _atom_site_type_symbol 
 _atom_site_fract_x 
 _atom_site_fract_y 
 _atom_site_fract_z 
 _atom_site_U_iso_or_equiv 
 _atom_site_adp_type 
 _atom_site_occupancy 
 _atom_site_symmetry_multiplicity 
 _atom_site_calc_flag 
 _atom_site_refinement_flags 
 _atom_site_disorder_assembly 
 _atom_site_disorder_group 
Cl1 Cl 0.7760(2) 0.8965(2) 0.8151(2) 0.0527(7) Uani 1 1 d . . . 
Cl2 Cl -0.0026(3) 0.3076(2) 0.4283(2) 0.0548(7) Uani 1 1 d . . . 
O1 O 0.5479(6) 1.0448(5) 0.8299(6) 0.0526(15) Uani 1 1 d . . . 
H1O H 0.4707 1.0704 0.8329 0.079 Uiso 1 1 calc R . . 
O2 O 0.1519(6) 0.7800(5) 0.3149(6) 0.0467(14) Uani 1 1 d . . . 
H2O H 0.1131 0.8414 0.3399 0.070 Uiso 1 1 calc R . . 
O3 O -0.2199(6) 0.1372(5) 0.1077(6) 0.0509(15) Uani 1 1 d . . . 
H3O H -0.1886 0.0877 0.1484 0.076 Uiso 1 1 calc R . . 
O4 O 0.0968(6) 0.4076(6) -0.0247(6) 0.0468(14) Uani 1 1 d . . . 
H4O H 0.0142 0.3565 -0.1082 0.070 Uiso 1 1 calc R . . 
C1 C 0.3213(8) 0.6016(7) 0.2607(8) 0.0341(18) Uani 1 1 d . . . 
H1A H 0.2744 0.6375 0.1881 0.041 Uiso 1 1 calc R . . 
C2 C 0.3896(8) 0.7238(7) 0.4120(7) 0.0313(17) Uani 1 1 d . . . 
C3 C 0.5354(8) 0.7549(7) 0.5303(8) 0.0322(18) Uani 1 1 d . . . 
H3 H 0.6014 0.7014 0.5175 0.039 Uiso 1 1 calc R . . 
C4 C 0.5891(9) 0.8619(8) 0.6677(9) 0.042(2) Uani 1 1 d . . . 
C5 C 0.4938(9) 0.9418(8) 0.6908(9) 0.043(2) Uani 1 1 d . . . 
C6 C 0.3490(9) 0.9147(8) 0.5703(9) 0.043(2) Uani 1 1 d . . . 
H6 H 0.2848 0.9704 0.5819 0.052 Uiso 1 1 calc R . . 
C7 C 0.2975(9) 0.8073(7) 0.4340(8) 0.0375(19) Uani 1 1 d . . . 
C8 C 0.1815(8) 0.4784(7) 0.2241(7) 0.0301(17) Uani 1 1 d . . . 
C9 C 0.1559(8) 0.4524(7) 0.3308(8) 0.0336(18) Uani 1 1 d . . . 
H9 H 0.2292 0.5148 0.4319 0.040 Uiso 1 1 calc R . . 
C10 C 0.0255(9) 0.3370(7) 0.2921(8) 0.0350(18) Uani 1 1 d . . . 
C11 C -0.0851(8) 0.2470(7) 0.1459(9) 0.0372(19) Uani 1 1 d . . . 
C12 C -0.0614(8) 0.2700(7) 0.0400(8) 0.0346(18) Uani 1 1 d . . . 
H12 H -0.1356 0.2072 -0.0608 0.041 Uiso 1 1 calc R . . 
C13 C 0.0690(8) 0.3832(7) 0.0776(8) 0.0335(18) Uani 1 1 d . . . 
C14 C 0.4565(8) 0.5583(7) 0.2372(7) 0.0334(18) Uani 1 1 d . . . 
C15 C 0.4886(10) 0.4438(8) 0.2499(9) 0.045(2) Uani 1 1 d . . . 
H15 H 0.4258 0.3893 0.2757 0.054 Uiso 1 1 calc R . . 
C16 C 0.6102(10) 0.4063(9) 0.2260(9) 0.050(2) Uani 1 1 d . . . 
H16 H 0.6296 0.3267 0.2354 0.060 Uiso 1 1 calc R . . 
C17 C 0.7024(10) 0.4825(9) 0.1891(10) 0.053(2) Uani 1 1 d . . . 
H17 H 0.7858 0.4565 0.1725 0.064 Uiso 1 1 calc R . . 
C18 C 0.6732(13) 0.5974(11) 0.1762(13) 0.084(4) Uani 1 1 d . . . 
H18 H 0.7359 0.6513 0.1499 0.101 Uiso 1 1 calc R . . 
C19 C 0.5500(12) 0.6347(11) 0.2020(13) 0.075(3) Uani 1 1 d . . . 
H19 H 0.5317 0.7153 0.1947 0.090 Uiso 1 1 calc R . . 
O1W O 0.2981(8) 0.1062(7) 0.8707(7) 0.0703(19) Uani 1 1 d . . . 
O1S O -0.0162(12) 0.0182(10) 0.6316(13) 0.132(4) Uani 1 1 d . . . 
C1S C 0.068(3) 0.127(2) 0.624(2) 0.172(7) Uani 1 1 d . . . 
 
loop_ 
 _atom_site_aniso_label 
 _atom_site_aniso_U_11 
 _atom_site_aniso_U_22 
 _atom_site_aniso_U_33 
 _atom_site_aniso_U_23 
 _atom_site_aniso_U_13 
 _atom_site_aniso_U_12 
Cl1 0.0379(11) 0.0399(12) 0.0469(13) 0.0043(10) 0.0031(10) 0.0151(9) 
Cl2 0.0639(14) 0.0538(14) 0.0545(14) 0.0287(11) 0.0345(12) 0.0175(11) 
O1 0.039(3) 0.041(3) 0.043(3) -0.005(3) 0.010(3) 0.015(3) 
O2 0.038(3) 0.047(3) 0.044(3) 0.012(3) 0.013(3) 0.026(3) 
O3 0.054(3) 0.040(3) 0.065(4) 0.023(3) 0.035(3) 0.018(3) 
O4 0.037(3) 0.053(4) 0.041(3) 0.017(3) 0.015(3) 0.015(3) 
C1 0.031(4) 0.030(4) 0.038(5) 0.014(4) 0.015(4) 0.012(3) 
C2 0.032(4) 0.026(4) 0.029(4) 0.008(3) 0.014(4) 0.006(3) 
C3 0.025(4) 0.026(4) 0.039(5) 0.012(4) 0.011(4) 0.010(3) 
C4 0.029(4) 0.033(5) 0.052(5) 0.016(4) 0.011(4) 0.008(4) 
C5 0.037(5) 0.031(5) 0.047(5) 0.010(4) 0.015(4) 0.010(4) 
C6 0.034(4) 0.031(4) 0.055(5) 0.010(4) 0.018(4) 0.014(3) 
C7 0.025(4) 0.032(5) 0.037(5) 0.006(4) 0.008(4) 0.007(3) 
C8 0.030(4) 0.029(4) 0.026(4) 0.010(3) 0.009(4) 0.013(3) 
C9 0.033(4) 0.019(4) 0.031(4) 0.000(3) 0.010(4) 0.010(3) 
C10 0.035(4) 0.030(4) 0.035(5) 0.012(4) 0.016(4) 0.010(4) 
C11 0.028(4) 0.025(4) 0.058(6) 0.014(4) 0.025(4) 0.010(3) 
C12 0.024(4) 0.033(4) 0.030(4) 0.006(4) 0.005(4) 0.011(3) 
C13 0.030(4) 0.041(5) 0.040(5) 0.023(4) 0.021(4) 0.017(4) 
C14 0.029(4) 0.033(4) 0.028(4) 0.008(3) 0.008(4) 0.014(3) 
C15 0.046(5) 0.037(5) 0.058(5) 0.024(4) 0.027(4) 0.017(4) 
C16 0.049(5) 0.054(5) 0.063(6) 0.033(5) 0.031(5) 0.035(4) 
C17 0.055(6) 0.060(6) 0.073(6) 0.037(5) 0.045(5) 0.034(5) 
C18 0.100(8) 0.109(9) 0.154(11) 0.101(9) 0.109(9) 0.076(7) 
C19 0.090(7) 0.089(7) 0.140(10) 0.093(8) 0.092(8) 0.066(6) 
O1W 0.090(5) 0.080(5) 0.091(5) 0.057(4) 0.064(4) 0.054(4) 
O1S 0.114(7) 0.092(7) 0.199(11) 0.058(7) 0.088(8) 0.050(6) 
C1S 0.168(18) 0.187(19) 0.177(18) 0.081(16) 0.083(16) 0.106(16) 
 
_geom_special_details 
; 
 All esds (except the esd in the dihedral angle between two l.s. planes) 
 are estimated using the full covariance matrix.  The cell esds are taken 
 into account individually in the estimation of esds in distances, angles 
 and torsion angles; correlations between esds in cell parameters are only 
 used when they are defined by crystal symmetry.  An approximate (isotropic) 
 treatment of cell esds is used for estimating esds involving l.s. planes. 
; 
 
loop_ 
 _geom_bond_atom_site_label_1 
 _geom_bond_atom_site_label_2 
 _geom_bond_distance 
 _geom_bond_site_symmetry_2 
 _geom_bond_publ_flag 
Cl1 C4 1.747(8) . ? 
Cl2 C10 1.747(7) . ? 
O1 C5 1.375(9) . ? 
O1 H1O 0.8400 . ? 
O2 C7 1.382(8) . ? 
O2 H2O 0.8400 . ? 
O3 C11 1.382(8) . ? 
O3 H3O 0.8400 . ? 
O4 C13 1.354(8) . ? 
O4 H4O 0.8400 . ? 
C1 C8 1.508(9) . ? 
C1 C2 1.522(10) . ? 
C1 C14 1.530(10) . ? 
C1 H1A 1.0000 . ? 
C2 C3 1.367(9) . ? 
C2 C7 1.401(10) . ? 
C3 C4 1.380(10) . ? 
C3 H3 0.9500 . ? 
C4 C5 1.402(11) . ? 
C5 C6 1.385(10) . ? 
C6 C7 1.378(10) . ? 
C6 H6 0.9500 . ? 
C8 C13 1.396(10) . ? 
C8 C9 1.399(10) . ? 
C9 C10 1.391(10) . ? 
C9 H9 0.9500 . ? 
C10 C11 1.380(10) . ? 
C11 C12 1.367(10) . ? 
C12 C13 1.381(10) . ? 
C12 H12 0.9500 . ? 
C14 C19 1.357(11) . ? 
C14 C15 1.377(10) . ? 
C15 C16 1.382(11) . ? 
C15 H15 0.9500 . ? 
C16 C17 1.362(11) . ? 
C16 H16 0.9500 . ? 
C17 C18 1.373(11) . ? 
C17 H17 0.9500 . ? 
C18 C19 1.406(12) . ? 
C18 H18 0.9500 . ? 
C19 H19 0.9500 . ? 
O1S C1S 1.35(2) . ? 
 
loop_ 
 _geom_angle_atom_site_label_1 
 _geom_angle_atom_site_label_2 
 _geom_angle_atom_site_label_3 
 _geom_angle 
 _geom_angle_site_symmetry_1 
 _geom_angle_site_symmetry_3 
 _geom_angle_publ_flag 
C5 O1 H1O 109.5 . . ? 
C7 O2 H2O 109.5 . . ? 
C11 O3 H3O 109.5 . . ? 
C13 O4 H4O 109.5 . . ? 
C8 C1 C2 113.7(6) . . ? 
C8 C1 C14 112.3(6) . . ? 
C2 C1 C14 112.0(6) . . ? 
C8 C1 H1A 106.0 . . ? 
C2 C1 H1A 106.0 . . ? 
C14 C1 H1A 106.0 . . ? 
C3 C2 C7 117.6(6) . . ? 
C3 C2 C1 123.4(7) . . ? 
C7 C2 C1 119.0(6) . . ? 
C2 C3 C4 121.7(7) . . ? 
C2 C3 H3 119.1 . . ? 
C4 C3 H3 119.1 . . ? 
C3 C4 C5 120.6(7) . . ? 
C3 C4 Cl1 119.7(6) . . ? 
C5 C4 Cl1 119.6(6) . . ? 
O1 C5 C6 122.6(7) . . ? 
O1 C5 C4 119.3(7) . . ? 
C6 C5 C4 118.0(7) . . ? 
C7 C6 C5 120.4(7) . . ? 
C7 C6 H6 119.8 . . ? 
C5 C6 H6 119.8 . . ? 
C6 C7 O2 120.0(7) . . ? 
C6 C7 C2 121.6(7) . . ? 
O2 C7 C2 118.5(6) . . ? 
C13 C8 C9 116.5(6) . . ? 
C13 C8 C1 120.2(6) . . ? 
C9 C8 C1 123.3(6) . . ? 
C10 C9 C8 121.4(7) . . ? 
C10 C9 H9 119.3 . . ? 
C8 C9 H9 119.3 . . ? 
C11 C10 C9 120.3(7) . . ? 
C11 C10 Cl2 119.4(5) . . ? 
C9 C10 Cl2 120.2(6) . . ? 
C12 C11 C10 119.1(6) . . ? 
C12 C11 O3 120.6(7) . . ? 
C10 C11 O3 120.3(7) . . ? 
C11 C12 C13 120.9(7) . . ? 
C11 C12 H12 119.6 . . ? 
C13 C12 H12 119.6 . . ? 
O4 C13 C12 122.2(7) . . ? 
O4 C13 C8 116.0(6) . . ? 
C12 C13 C8 121.8(7) . . ? 
C19 C14 C15 117.7(7) . . ? 
C19 C14 C1 119.4(6) . . ? 
C15 C14 C1 122.9(7) . . ? 
C14 C15 C16 121.5(7) . . ? 
C14 C15 H15 119.3 . . ? 
C16 C15 H15 119.3 . . ? 
C17 C16 C15 120.6(7) . . ? 
C17 C16 H16 119.7 . . ? 
C15 C16 H16 119.7 . . ? 
C16 C17 C18 119.1(8) . . ? 
C16 C17 H17 120.5 . . ? 
C18 C17 H17 120.5 . . ? 
C17 C18 C19 119.6(8) . . ? 
C17 C18 H18 120.2 . . ? 
C19 C18 H18 120.2 . . ? 
C14 C19 C18 121.5(8) . . ? 
C14 C19 H19 119.2 . . ? 
C18 C19 H19 119.2 . . ? 
 
loop_ 
 _geom_torsion_atom_site_label_1 
 _geom_torsion_atom_site_label_2 
 _geom_torsion_atom_site_label_3 
 _geom_torsion_atom_site_label_4 
 _geom_torsion 
 _geom_torsion_site_symmetry_1 
 _geom_torsion_site_symmetry_2 
 _geom_torsion_site_symmetry_3 
 _geom_torsion_site_symmetry_4 
 _geom_torsion_publ_flag 
C8 C1 C2 C3 104.8(8) . . . . ? 
C14 C1 C2 C3 -23.9(9) . . . . ? 
C8 C1 C2 C7 -73.3(8) . . . . ? 
C14 C1 C2 C7 158.0(6) . . . . ? 
C7 C2 C3 C4 1.7(10) . . . . ? 
C1 C2 C3 C4 -176.4(6) . . . . ? 
C2 C3 C4 C5 0.8(11) . . . . ? 
C2 C3 C4 Cl1 179.8(5) . . . . ? 
C3 C4 C5 O1 177.9(7) . . . . ? 
Cl1 C4 C5 O1 -1.1(10) . . . . ? 
C3 C4 C5 C6 -3.2(11) . . . . ? 
Cl1 C4 C5 C6 177.8(6) . . . . ? 
O1 C5 C6 C7 -177.9(7) . . . . ? 
C4 C5 C6 C7 3.2(11) . . . . ? 
C5 C6 C7 O2 179.2(7) . . . . ? 
C5 C6 C7 C2 -0.8(11) . . . . ? 
C3 C2 C7 C6 -1.7(10) . . . . ? 
C1 C2 C7 C6 176.5(7) . . . . ? 
C3 C2 C7 O2 178.3(6) . . . . ? 
C1 C2 C7 O2 -3.5(10) . . . . ? 
C2 C1 C8 C13 156.6(7) . . . . ? 
C14 C1 C8 C13 -74.8(8) . . . . ? 
C2 C1 C8 C9 -23.3(9) . . . . ? 
C14 C1 C8 C9 105.3(8) . . . . ? 
C13 C8 C9 C10 0.4(10) . . . . ? 
C1 C8 C9 C10 -179.8(6) . . . . ? 
C8 C9 C10 C11 -1.8(11) . . . . ? 
C8 C9 C10 Cl2 179.9(5) . . . . ? 
C9 C10 C11 C12 2.3(10) . . . . ? 
Cl2 C10 C11 C12 -179.4(5) . . . . ? 
C9 C10 C11 O3 -176.2(6) . . . . ? 
Cl2 C10 C11 O3 2.1(9) . . . . ? 
C10 C11 C12 C13 -1.4(10) . . . . ? 
O3 C11 C12 C13 177.1(6) . . . . ? 
C11 C12 C13 O4 179.1(7) . . . . ? 
C11 C12 C13 C8 0.0(10) . . . . ? 
C9 C8 C13 O4 -178.6(6) . . . . ? 
C1 C8 C13 O4 1.5(10) . . . . ? 
C9 C8 C13 C12 0.5(10) . . . . ? 
C1 C8 C13 C12 -179.4(6) . . . . ? 
C8 C1 C14 C19 151.4(8) . . . . ? 
C2 C1 C14 C19 -79.1(9) . . . . ? 
C8 C1 C14 C15 -28.5(10) . . . . ? 
C2 C1 C14 C15 101.0(8) . . . . ? 
C19 C14 C15 C16 -0.8(12) . . . . ? 
C1 C14 C15 C16 179.1(7) . . . . ? 
C14 C15 C16 C17 0.1(13) . . . . ? 
C15 C16 C17 C18 0.1(14) . . . . ? 
C16 C17 C18 C19 0.4(17) . . . . ? 
C15 C14 C19 C18 1.3(15) . . . . ? 
C1 C14 C19 C18 -178.6(10) . . . . ? 
C17 C18 C19 C14 -1.2(18) . . . . ? 
 
_diffrn_measured_fraction_theta_max    0.917 
_diffrn_reflns_theta_full              22.3 
_diffrn_measured_fraction_theta_full   0.917 
_refine_diff_density_max    0.39 
_refine_diff_density_min   -0.40 
_refine_diff_density_rms    0.081 
# END OF CIF
